# Supplementary material for: Plasma fibronectin is a prognostic biomarker of disability in Parkinson’s disease: a prospective, multicenter cohort study
Source: PubMed Central journal article supplement — NPJ Parkinsons Dis. 2025 Jan 2;11:1. doi: 10.1038/s41531-024-00865-1 (PMC11697031; doi:10.1038/s41531-024-00865-1), 2025-01-02
Supplement: 41531_2024_865_MOESM1_ESM.pdf [file 41531_2024_865_MOESM1_ESM.pdf]

## **Supplementary data**

### **Inclusion and exclusion criteria**

The inclusion criteria were as follows: (1) 18–85 years old; (2) PD without any disability milestones (i.e., frequent falling, wheelchair dependence, residential care, dementia, visual hallucinations and death); and (3) agreement to participate in the clinical trial. The exclusion criteria were comorbidities that were likely to affect the evaluation of neurological function or disease progression, as follows: (1) PD patients with neurological comorbidities, including Alzheimer’s disease (AD), major psychiatric disorders, cerebrovascular disease, head tumor or injury, and normal pressure hydrocephalus; (2) PD patients with internal comorbidities, including systemic infection, liver or kidney disease, cardiovascular events, tumors, hematemesis, other critical diseases and severe organ function failure; (3) PD patients with a history of surgery or trauma, including deep brain stimulation (DBS) operation and bone fracture; and (4) PD patients with contraindications to magnetic resonance (MR) examination, including a). Patients with cardiac pacemakers and cardiac stents; b). Patients with claustrophobia and pregnancy; c). Patients with fixed dentures, birth control devices, etc.; and d). Patients allergic to magnetic resonance contrast agents.

## Supplementary Figure 1. Flow chart of the study

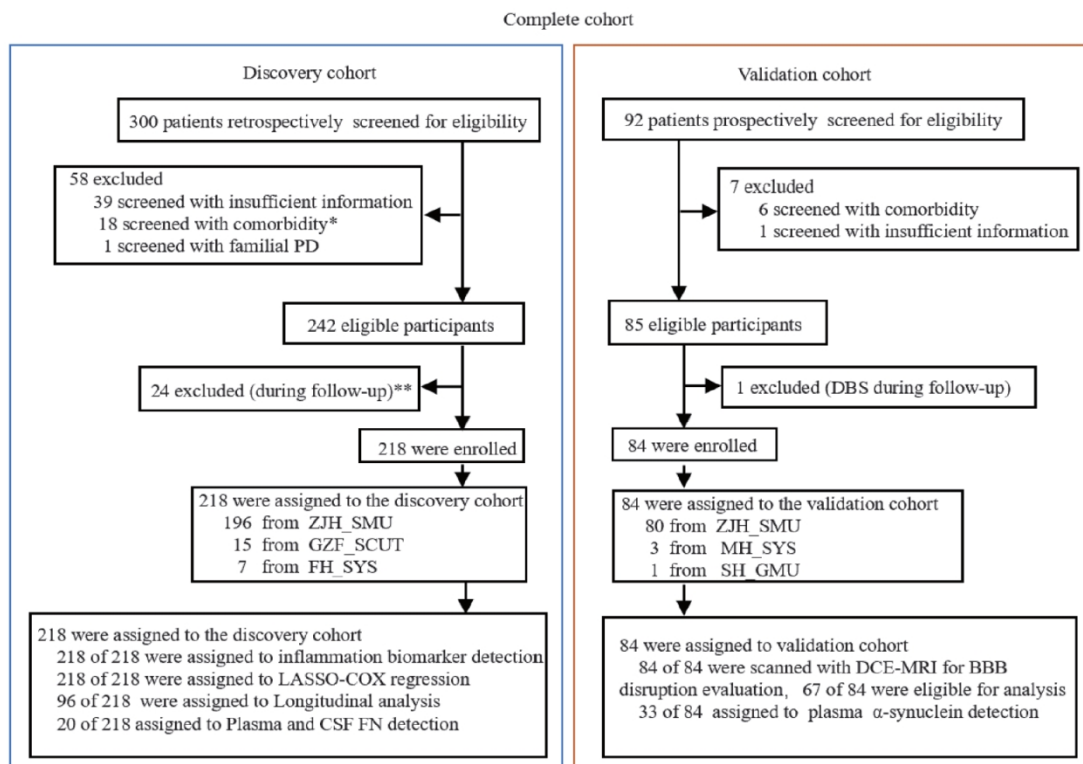

Flow diagram illustrating the design of the study. Abbreviations: CSF= Cerebrospinal Fluid; DBS= deep brain stimulation; DCE-MRI: dynamic contrast-enhanced magnetic resonance imaging; FN= fibronectin; LASSO-COX= Least Absolute Shrinkage and Selection Operator – Cox; PD= Parkinson’s disease; ZJH\_SMU: Zhujiang Hospital of Southern Medical University; MH\_SYS: Sun Yat-Sen Memorial Hospital of Sun Yat-sen University; FH\_SYS: The First Affiliated Hospital of Sun Yat-sen University; GZF\_SCUT: Guangzhou First People’s Hospital of South China University of Technology; SH\_GMU: The Second Affiliated Hospital of Guangzhou Medical University. \*\* 24 excluded (lost to follow-up) in the discovery cohort. \*8 with serious cardiovascular and cerebrovascular diseases; 2 with DBS; 2 with cancer; 5 with bone fracture; 7 lost to follow-up or conflicting clinical information.

**Supplementary Figure 2. Possible risk factors related to the development of the first milestone of PD patients screened by Lasso-Cox regression**

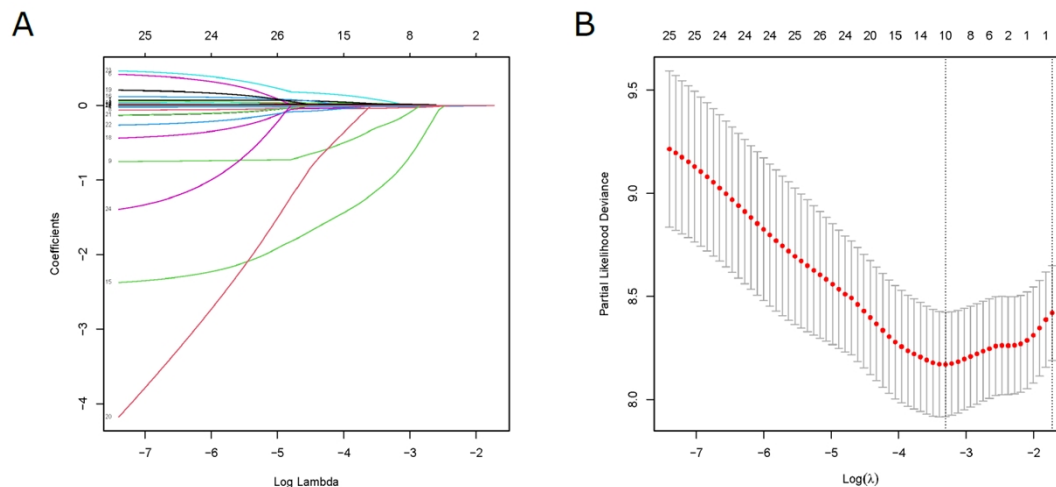

Regression coefficient diagram based on LASSO Cox regression. **(A)** LASSO coefficient profiles for several variables in univariate linear regression analysis. Coefficient profiles decrease with larger lambda values. **(B)** Cross-validation for selecting the tuning parameters for the LASSO model. The vertical lines are plotted based on the optimal data according to the minimum criteria and 1-standard error criterion. The left vertical line represents the final 24 variables identified. LASSO regression showed that the variables (coefficients) related to the development of milestones in PD patients included age (0.024246), pFN (-0.017086), UA (-0.001545), Alb (-0.068079), and hsCRP (0.016296). Abbreviations: Alb= albumin, hsCRP= hypersensitive C-reactive protein, pFN=plasma fibronectin, UA= uric acid.

### Supplementary Figure 3. The determination of cutoff values for each risk factor with enumeration method.

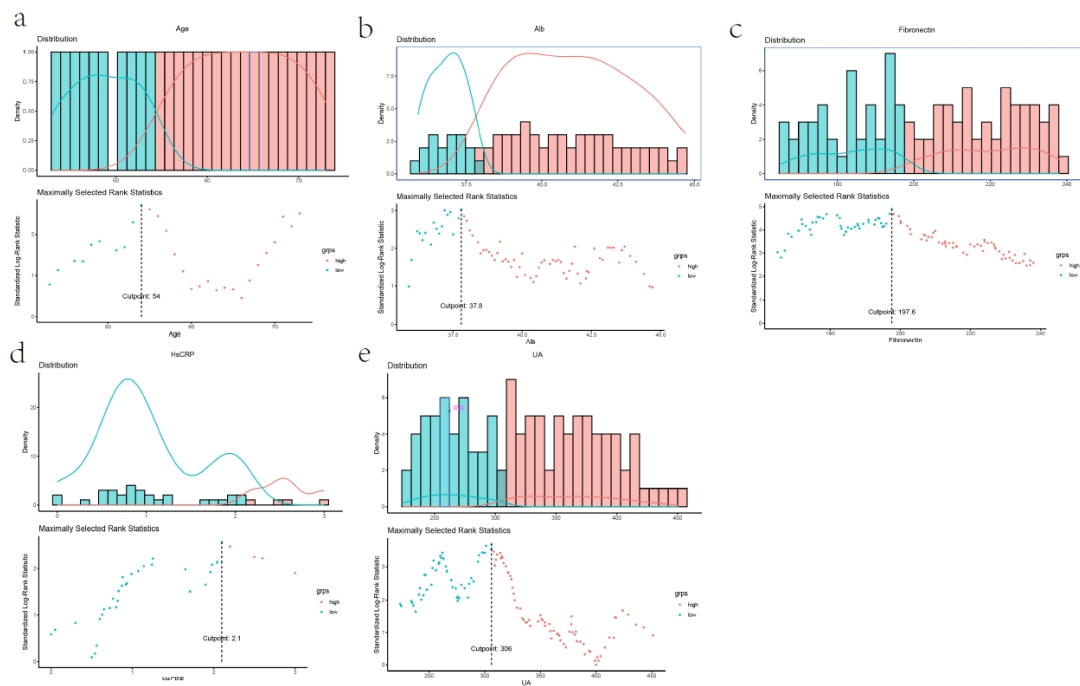

The cutoff values of the predictive factors were as follows: (A) age is 54 years at onset, (B) Alb is 37.8 g, (C) pFN is 197.6 mg/L, (D) hsCRP is 2.1 mg/L and (E) UA, is 306  $\mu\text{mol/L}$ , respectively. Abbreviations: Alb= albumin, hsCRP= hypersensitive C-reactive protein, pFN=plasma fibronectin, UA= uric acid.

**Supplementary Figure 4. The AUC values for each risk factor.**

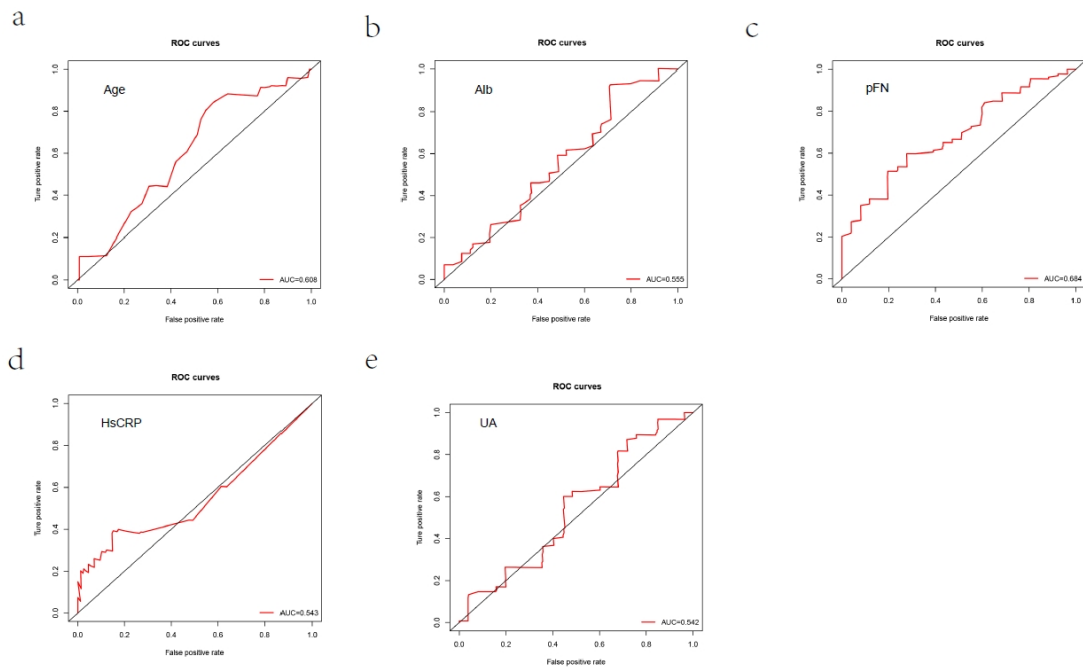

**(A-E)**, The AUC values of the predictive factors. Abbreviations: ROC= Receiver Operating Characteristic Curve; AUC= Area Under Curve.

**Supplementary Figure 5. Predicting disease progression by baseline pFN as assessed by survival analysis**

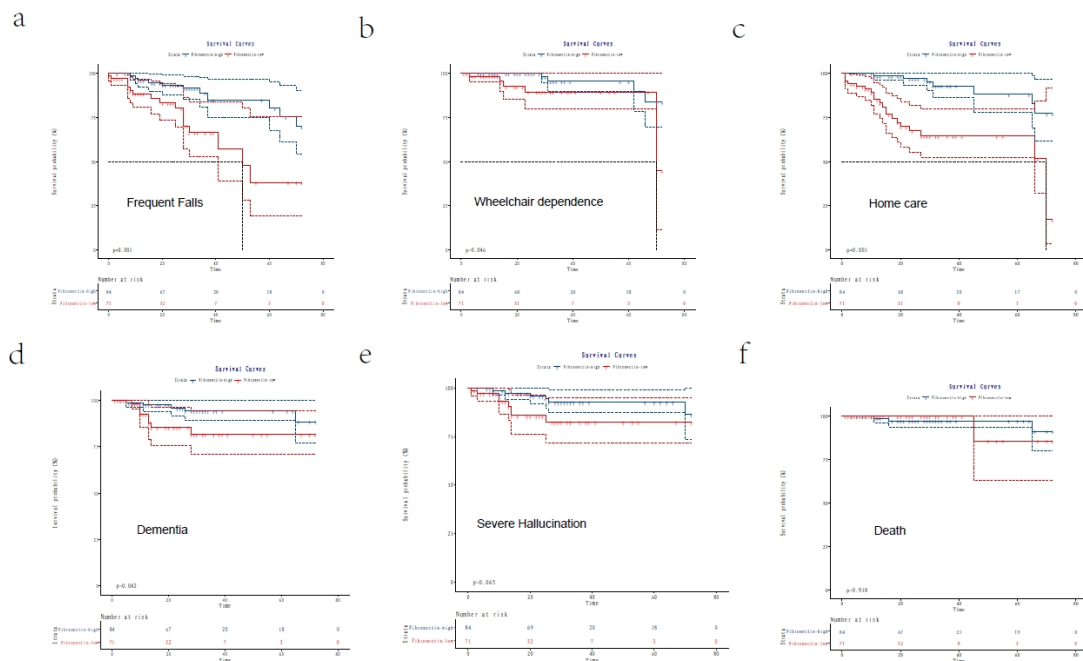

Survival curve for low-and high-pFN group were analysed. The disease progression was defined as the development of frequent falls ( $p < 0.001$ ) (A), wheelchair dependence ( $p = 0.046$ ) (B), homecare ( $p < 0.001$ ) (C), dementia ( $p = 0.042$ ) (D), severe hallucination ( $p = 0.065$ ) (E) and death ( $p = 0.918$ ) (F), respectively. Abbreviations: pFN=plasma fibronectin.

**Supplementary Figure 6. CSF and plasma FN levels are highly correlated.**

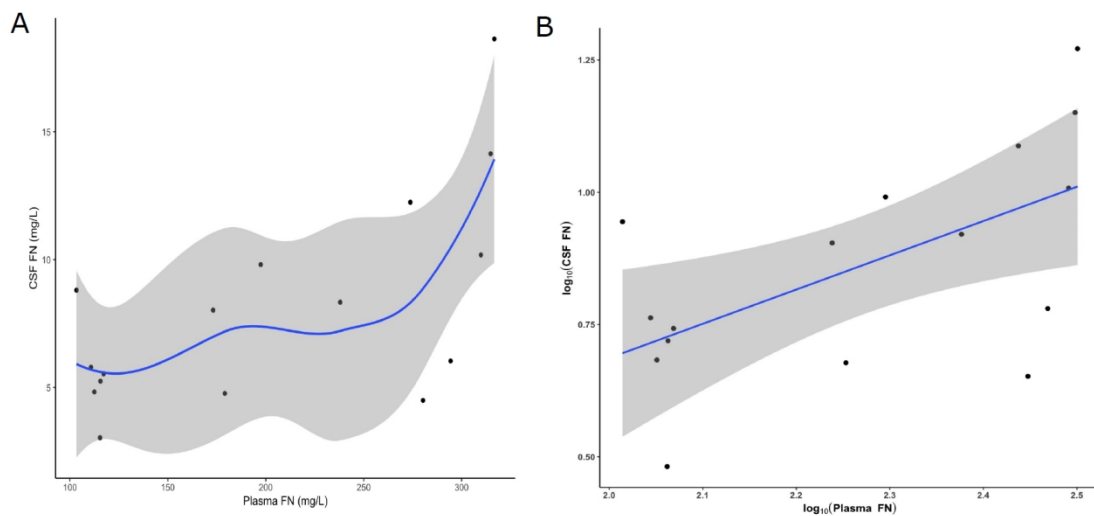

**A**, Significant associations were found between CSF FN and plasma FN levels in PD ( $n = 16$ , Spearman correlation coefficient = 0.547,  $p = 0.028$ ). The shaded areas represent the 99% credible intervals around the model estimates. **B**,  $\log_{10}$  transformation of FN in CSF and plasma was positively linearly correlated after adjusting for age, sex and disease course ( $F = 3.65$ ,  $R^2 = 0.57$ , adjusted  $R^2 = 0.41$ ,  $p = 0.04$ ). Abbreviations: CSF= Cerebrospinal Fluid; pFN=plasma fibronectin; PD= Parkinson's disease.

**Supplementary table 1.** The selection and definition of 24 candidate markers based on peripheral inflammatory mechanisms.

| Candidate markers             | Definition                                                                                                                                          | Detection methods       | Reagent supplier                | Basis for selection and References                                                                                                                                                                                                                                                                                   |
|-------------------------------|-----------------------------------------------------------------------------------------------------------------------------------------------------|-------------------------|---------------------------------|----------------------------------------------------------------------------------------------------------------------------------------------------------------------------------------------------------------------------------------------------------------------------------------------------------------------|
| Clinical variables            |                                                                                                                                                     |                         |                                 |                                                                                                                                                                                                                                                                                                                      |
| Age (y)                       | Age at onset                                                                                                                                        | /                       | /                               | 1. Kempster, P. A. et al. <sup>1</sup>                                                                                                                                                                                                                                                                               |
| Sex                           | Biological sex                                                                                                                                      | /                       | /                               | 1. Carlisle, S. M. et al. <sup>2</sup><br>2. Abraham, D. S. et al. <sup>3</sup>                                                                                                                                                                                                                                      |
| Disease duration (y)          | Years from symptoms onset and diagnosis to first visit                                                                                              | /                       | /                               | 1. Riggeal, B. D. <sup>4</sup>                                                                                                                                                                                                                                                                                       |
| HBP                           | High blood pressure diagnosed by a physician according to the diagnostic criteria SBP $\geq$ 140mmHg and/ or DBP $\geq$ 90mmHg.                     | /                       | /                               | 1. Ng, Y. F. <sup>5</sup><br>2. Chen, J. <sup>6</sup><br>3. Qiu, C. <sup>7</sup><br>4. Simon, K. C. <sup>8</sup>                                                                                                                                                                                                     |
| DM                            | Diabetes mellitus diagnosed by a physician according to the diagnostic criteria FPG $\geq$ 7mmol/L or 2h PG $\geq$ 11.1mmol/L or HbA1c $\geq$ 6.5%. | /                       | /                               | 1. Zhong, Q. <sup>9</sup><br>2. Senkevich, K. <sup>10</sup><br>3. Ou, R. <sup>11</sup><br>4. de Pablo-Fernandez, E. <sup>12</sup><br>5. Chohan, H. <sup>13</sup>                                                                                                                                                     |
| Inflammatory protein or cells |                                                                                                                                                     |                         |                                 |                                                                                                                                                                                                                                                                                                                      |
| Hs-CRP, mg/L                  | high-sensitivity C-reactive protein                                                                                                                 | CRP analyzer            | HEALES, Shenzhen, China         | 1. Mehta, N. <sup>14</sup><br>2. Gao, M. <sup>15</sup><br>3. Sun, S. <sup>16</sup><br>4. Shen, J. <sup>17</sup><br>5. Lyra, P. <sup>18</sup><br>6. Kim, R. <sup>19</sup><br>7. Dommershuijsen, L. J. <sup>20</sup><br>8. Yang, W. <sup>21</sup><br>9. Mollenhauer, B. <sup>22</sup><br>10. Song, I. U. <sup>23</sup> |
| Lymphocyte, G/L               | Lymphocyte                                                                                                                                          | Sysmex XN-10 Hematology | Sysmex Corporation, Kobe, Japan | 1. Dommershuijsen, L. J. <sup>20</sup>                                                                                                                                                                                                                                                                               |



|                                          |                                      | Analyzer                                                                    |                                                  |                                                                                                                                                                                                                                                                                                                                                                                                                                                                                      |
|------------------------------------------|--------------------------------------|-----------------------------------------------------------------------------|--------------------------------------------------|--------------------------------------------------------------------------------------------------------------------------------------------------------------------------------------------------------------------------------------------------------------------------------------------------------------------------------------------------------------------------------------------------------------------------------------------------------------------------------------|
| Neutrophils, G/L                         | Neutrophils                          | Sysmex XN-10 Hematology Analyzer                                            | Sysmex Corporation, Kobe, Japan                  | <ol style="list-style-type: none"> <li>Munoz-Delgado, L.<sup>24</sup></li> <li>Kim, R.<sup>25</sup></li> <li>Kara, S. P.<sup>26</sup></li> <li>Fan, Y.<sup>27</sup></li> <li>Vitte, J.<sup>28</sup></li> </ol>                                                                                                                                                                                                                                                                       |
| L/N ratio,                               | L/N ratio                            | /                                                                           | Sysmex Corporation, Kobe, Japan                  | <ol style="list-style-type: none"> <li>Liu, Z.<sup>29</sup></li> <li>Kara, S. P.<sup>26</sup></li> <li>Munoz-Delgado, L.<sup>24</sup></li> </ol>                                                                                                                                                                                                                                                                                                                                     |
| Metabolic inflammation molecular markers |                                      |                                                                             |                                                  |                                                                                                                                                                                                                                                                                                                                                                                                                                                                                      |
| UA, $\mu\text{mol/L}$                    | Uric acid                            | Uric Acid (UA) Colorimetric Assay Kit (E-BC-K016-M)                         | Elabscience Biotechnology (Wuhan, Hubei, China). | <ol style="list-style-type: none"> <li>Mollenhauer, B.<sup>22</sup></li> <li>de Lau, L. M.<sup>30</sup></li> <li>Annamaki, T.<sup>31</sup></li> <li>Schlesinger, I.<sup>32</sup></li> <li>Winqvist, A.<sup>33</sup></li> <li>Gonzalez-Aramburu, I.<sup>34</sup></li> <li>Pellecchia, M. T.<sup>35</sup></li> <li>Koros, C.<sup>36</sup></li> <li>Bougea, A.<sup>37</sup></li> <li>Koros, C.<sup>38</sup></li> <li>Seifar, F.<sup>39</sup></li> <li>Koros, C.<sup>40</sup></li> </ol> |
| Chol, mmol/L                             | Cholesterol                          | Total Cholesterol and Cholesteryl Ester Fluorometric Assay Kit (E-BC-F032)  | Elabscience Biotechnology (Wuhan, Hubei, China). | <ol style="list-style-type: none"> <li>Alrouji, M.<sup>41</sup></li> <li>Wang, K.<sup>42</sup></li> <li>Pingale, T. D.<sup>43</sup></li> <li>Garcia-Sanz, P.<sup>44</sup></li> <li>Yang, W.<sup>21</sup></li> <li>Jin, U.<sup>45</sup></li> <li>Simon, K. C.<sup>8</sup></li> </ol>                                                                                                                                                                                                  |
| HDL-C, mmol/L                            | High-density lipoprotein cholesterol | High-density Lipoprotein Cholesterol (HDL-C) Colorimetric Assay Kit (Double | Elabscience Biotechnology (Wuhan, Hubei, China). | <ol style="list-style-type: none"> <li>Mollenhauer, B.<sup>22</sup></li> <li>Park, J. H.<sup>46</sup></li> <li>Liu, Z.<sup>29</sup></li> <li>Yang, W.<sup>21</sup></li> <li>Staszewski, J.<sup>47</sup></li> <li>Hottman, D. A.<sup>48</sup></li> </ol>                                                                                                                                                                                                                              |

|               |                                     |                                                                                                    |                                                  |                                                                                                                           |
|---------------|-------------------------------------|----------------------------------------------------------------------------------------------------|--------------------------------------------------|---------------------------------------------------------------------------------------------------------------------------|
|               |                                     | reagents) (E-BC-K221-M)                                                                            |                                                  |                                                                                                                           |
| LDL-C, mmol/L | Low-density lipoprotein cholesterol | Low-density Lipoprotein Cholesterol (LDL-C) Colorimetric Assay Kit (Double reagents) (E-BC-K205-M) | Elabscience Biotechnology (Wuhan, Hubei, China). | 1. Wei, Q. <sup>49</sup>                                                                                                  |
| Glu, mmol/L   | Fasting glucose                     | Glucose (GLU) Fluorometric Assay Kit (E-BC-F037)                                                   | Elabscience Biotechnology (Wuhan, Hubei, China). | 1. Chohan, H. <sup>13</sup><br>2. Foltynie, T. <sup>50</sup>                                                              |
| Alb, g/L      | Albumin                             | Human ALB(Albumin) ELISA Kit (E-EL-H6105)                                                          | Elabscience Biotechnology (Wuhan, Hubei, China). | 1. Gao, M. <sup>15</sup><br>2. Sun, S. <sup>16</sup><br>3. Shen, J. <sup>17</sup>                                         |
| A/G ratio     | Albumin/Globulin ratio              | Human IgG (Immunoglobulin G) ELISA Kit (E-EL-H0169c)                                               | Elabscience Biotechnology (Wuhan, Hubei, China). | /                                                                                                                         |
| ADA, IU/L     | Adenosine deaminase                 | Adenosine Deaminase (ADA) Activity Assay Kit (E-BC-K197-M)                                         | Elabscience Biotechnology (Wuhan, Hubei, China). | 1. Huang, W. <sup>51</sup><br>2. Ivanova, E. A. <sup>52</sup><br>3. Chiba, S. <sup>53</sup><br>4. Chiba, S. <sup>54</sup> |
| RBP, mg/L     | Retinol binding protein             | Human RBP4(Retinol Binding Protein 4) ELISA Kit (E-EL-H1581c)                                      | Elabscience Biotechnology (Wuhan, Hubei, China). | Jimenez-Jimenez, F. J. <sup>55</sup>                                                                                      |
| SOD, kU/l     | Superoxide dismutase                | Total Superoxide Dismutase (T-SOD) Activity                                                        | Elabscience Biotechnology (Wuhan, Hubei, China). | 1. Yang, W. <sup>21</sup>                                                                                                 |

|                                              |                       |                                                      |                                               |                                                                                                                                                                                                                                                                                                                                              |
|----------------------------------------------|-----------------------|------------------------------------------------------|-----------------------------------------------|----------------------------------------------------------------------------------------------------------------------------------------------------------------------------------------------------------------------------------------------------------------------------------------------------------------------------------------------|
|                                              |                       | Assay Kit<br>(Hydroxylamine Method)<br>(E-BC-K019-S) |                                               |                                                                                                                                                                                                                                                                                                                                              |
| LDH, IU/L                                    | Lactate dehydrogenase | AU680 Chemistry Analyzer                             | Beckman Coulter Inc; Brea, California, U.S.A. | 1. Chowdhury, C. S. <sup>56</sup><br>2. Wu, X. B. <sup>57</sup><br>3. Miyoshi, N. <sup>58</sup>                                                                                                                                                                                                                                              |
| pFN, mg/L                                    | Plasma fibronectin    | Human Fibronectin ELISA kit (ab108848)               | Abcam, Cambridge, UK                          | 1. Yoshizaki, S. <sup>59</sup><br>2. Lemanska-Perek, A. <sup>60</sup><br>3. Dhanesha, N. <sup>61</sup><br>4. Dhanesha, N. <sup>62</sup><br>5. Khan, M. M. <sup>63</sup><br>6. Brenmoehl, J. <sup>64</sup><br>7. Goos, M. <sup>65</sup><br>8. Bouvenot, G. <sup>66</sup><br>9. Stecher, V. J. <sup>67</sup><br>10. Scott, D. L. <sup>68</sup> |
| Hemostatic and coagulative molecular markers |                       |                                                      |                                               |                                                                                                                                                                                                                                                                                                                                              |
| FIB, g/L                                     | Fibrinogen            | Clauss method by STA compact coagulometer            | Diagnostica Stago, Asnieres, France           | 1. Torbitz, V. D. <sup>69</sup><br>2. Wong, K. T. <sup>70</sup>                                                                                                                                                                                                                                                                              |
| DDI, mg/L                                    | D-dimer               | Clauss method by STA compact coagulometer            | Diagnostica Stago, Asnieres, France           | 1. Feng, J.                                                                                                                                                                                                                                                                                                                                  |
| PLG, %                                       | Plasminogen           | Clauss method by STA compact coagulometer            | Diagnostica Stago, Asnieres, France           | 1. Xu, Q. <sup>71</sup><br>2. Reuland, C. J. <sup>72</sup><br>3. Pan, H. <sup>73</sup>                                                                                                                                                                                                                                                       |

#### References

1. Kempster PA, O'Sullivan SS, Holton JL, Revesz T, Lees AJ. Relationships between age and late progression of Parkinson's disease: a clinico-pathological study. *Brain : a journal of neurology* 2010; **133**(Pt 6): 1755-62.
2. Carlisle SM, Qin H, Hendrickson RC, et al. Sex-based differences in the activation of peripheral blood

- monocytes in early Parkinson disease. *NPJ Parkinson's disease* 2021; **7**(1): 36.
3. Abraham DS, Gruber-Baldini AL, Magder LS, et al. Sex differences in Parkinson's disease presentation and progression. *Parkinsonism & related disorders* 2019; **69**: 48-54.
  4. Riggeal BD, Crucian GP, Seignourel P, et al. Cognitive decline tracks motor progression and not disease duration in Parkinson patients. *Neuropsychiatric disease and treatment* 2007; **3**(6): 955-8.
  5. Ng YF, Ng E, Lim EW, Prakash KM, Tan LCS, Tan EK. Case-control study of hypertension and Parkinson's disease. *NPJ Parkinson's disease* 2021; **7**(1): 63.
  6. Chen J, Zhang C, Wu Y, Zhang D. Association between Hypertension and the Risk of Parkinson's Disease: A Meta-Analysis of Analytical Studies. *Neuroepidemiology* 2019; **52**(3-4): 181-92.
  7. Qiu C, Hu G, Kivipelto M, et al. Association of blood pressure and hypertension with the risk of Parkinson disease: the National FINRISK Study. *Hypertension* 2011; **57**(6): 1094-100.
  8. Simon KC, Chen H, Schwarzschild M, Ascherio A. Hypertension, hypercholesterolemia, diabetes, and risk of Parkinson disease. *Neurology* 2007; **69**(17): 1688-95.
  9. Zhong Q, Wang S. Association between diabetes mellitus, prediabetes and risk, disease progression of Parkinson's disease: A systematic review and meta-analysis. *Frontiers in aging neuroscience* 2023; **15**: 1109914.
  10. Senkevich K, Alipour P, Chernyavskaya E, Yu E, Noyce AJ, Gan-Or Z. Potential Protective Link Between Type I Diabetes and Parkinson's Disease Risk and Progression. *Movement disorders : official journal of the Movement Disorder Society* 2023; **38**(7): 1350-5.
  11. Ou R, Wei Q, Hou Y, et al. Effect of diabetes control status on the progression of Parkinson's disease: A prospective study. *Annals of clinical and translational neurology* 2021; **8**(4): 887-97.
  12. de Pablo-Fernandez E, Courtney R, Rockliffe A, Gentleman S, Holton JL, Warner TT. Faster disease progression in Parkinson's disease with type 2 diabetes is not associated with increased alpha-synuclein, tau, amyloid-beta or vascular pathology. *Neuropathology and applied neurobiology* 2021; **47**(7): 1080-91.
  13. Chohan H, Senkevich K, Patel RK, et al. Type 2 Diabetes as a Determinant of Parkinson's Disease Risk and Progression. *Movement disorders : official journal of the Movement Disorder Society* 2021; **36**(6): 1420-9.
  14. Mehta N, Luthra NS, Corcos DM, Fantuzzi G. C-reactive protein as the biomarker of choice to monitor the effects of exercise on inflammation in Parkinson's disease. *Frontiers in immunology* 2023; **14**: 1178448.
  15. Gao M, Zhang C, Gao L, Sun S, Song L, Liu S. Association between C-reactive protein-albumin ratio and overall survival in Parkinson's disease using publicly available data: A retrospective cohort study. *Heliyon* 2023; **9**(2): e12671.
  16. Sun S, Wen Y, Li Y. Serum albumin, cognitive function, motor impairment, and survival prognosis in Parkinson disease. *Medicine* 2022; **101**(37): e30324.
  17. Shen J, Amari N, Zack R, et al. Plasma MIA, CRP, and Albumin Predict Cognitive Decline in Parkinson's Disease. *Annals of neurology* 2022; **92**(2): 255-69.
  18. Lyra P, Botelho J, Machado V, et al. Self-reported periodontitis and C-reactive protein in Parkinson's disease: a cross-sectional study of two American cohorts. *NPJ Parkinson's disease* 2022; **8**(1): 40.

19. Kim R, Kim HJ, Shin JH, Lee CY, Jeon SH, Jeon B. Serum Inflammatory Markers and Progression of Nonmotor Symptoms in Early Parkinson's Disease. *Movement disorders : official journal of the Movement Disorder Society* 2022; **37**(7): 1535-41.
20. Dommershuijsen LJ, Ruiters R, Eler NS, Rizopoulos D, Ikram MA, Ikram MK. Peripheral Immune Cell Numbers and C-Reactive Protein in Parkinson's Disease: Results from a Population-Based Study. *Journal of Parkinson's disease* 2022; **12**(2): 667-78.
21. Yang W, Chang Z, Que R, et al. Contra-Directional Expression of Plasma Superoxide Dismutase with Lipoprotein Cholesterol and High-Sensitivity C-reactive Protein as Important Markers of Parkinson's Disease Severity. *Frontiers in aging neuroscience* 2020; **12**: 53.
22. Mollenhauer B, Zimmermann J, Sixel-Doring F, et al. Baseline predictors for progression 4 years after Parkinson's disease diagnosis in the De Novo Parkinson Cohort (DeNoPa). *Movement disorders : official journal of the Movement Disorder Society* 2019; **34**(1): 67-77.
23. Song IU, Cho HJ, Kim JS, Park IS, Lee KS. Serum hs-CRP levels are increased in de Novo Parkinson's disease independently from age of onset. *European neurology* 2014; **72**(5-6): 285-9.
24. Munoz-Delgado L, Labrador-Espinosa MA, Macias-Garcia D, et al. Peripheral Inflammation Is Associated with Dopaminergic Degeneration in Parkinson's Disease. *Movement disorders : official journal of the Movement Disorder Society* 2023; **38**(5): 755-63.
25. Kim R, Kang N, Byun K, Park K, Jun JS. Prognostic significance of peripheral neutrophils and lymphocytes in early untreated Parkinson's disease: an 8-year follow-up study. *Journal of neurology, neurosurgery, and psychiatry* 2023; **94**(12): 1040-6.
26. Kara SP, Altunan B, Unal A. Investigation of the peripheral inflammation (neutrophil-lymphocyte ratio) in two neurodegenerative diseases of the central nervous system. *Neurological sciences : official journal of the Italian Neurological Society and of the Italian Society of Clinical Neurophysiology* 2022; **43**(3): 1799-807.
27. Fan Y, Howden AJM, Sarhan AR, et al. Interrogating Parkinson's disease LRRK2 kinase pathway activity by assessing Rab10 phosphorylation in human neutrophils. *The Biochemical journal* 2018; **475**(1): 23-44.
28. Vitte J, Michel BF, Bongrand P, Gastaut JL. Oxidative stress level in circulating neutrophils is linked to neurodegenerative diseases. *Journal of clinical immunology* 2004; **24**(6): 683-92.
29. Liu Z, Fan Q, Wu S, Wan Y, Lei Y. Compared with the monocyte to high-density lipoprotein ratio (MHR) and the neutrophil to lymphocyte ratio (NLR), the neutrophil to high-density lipoprotein ratio (NHR) is more valuable for assessing the inflammatory process in Parkinson's disease. *Lipids in health and disease* 2021; **20**(1): 35.
30. de Lau LM, Koudstaal PJ, Hofman A, Breteler MM. Serum uric acid levels and the risk of Parkinson disease. *Annals of neurology* 2005; **58**(5): 797-800.
31. Annanmaki T, Muuronen A, Murros K. Low plasma uric acid level in Parkinson's disease. *Movement disorders : official journal of the Movement Disorder Society* 2007; **22**(8): 1133-7.
32. Schlesinger I, Schlesinger N. Uric acid in Parkinson's disease. *Movement disorders : official journal of the Movement Disorder Society* 2008; **23**(12): 1653-7.
33. Winquist A, Steenland K, Shankar A. Higher serum uric acid associated with decreased Parkinson's disease

prevalence in a large community-based survey. *Movement disorders : official journal of the Movement Disorder Society* 2010; **25**(7): 932-6.

34. Gonzalez-Aramburu I, Sanchez-Juan P, Jesus S, et al. Genetic variability related to serum uric acid concentration and risk of Parkinson's disease. *Movement disorders : official journal of the Movement Disorder Society* 2013; **28**(12): 1737-40.

35. Pellecchia MT, Savastano R, Moccia M, et al. Lower serum uric acid is associated with mild cognitive impairment in early Parkinson's disease: a 4-year follow-up study. *Journal of neural transmission* 2016; **123**(12): 1399-402.

36. Koros C, Simitsi AM, Papadimitriou D, et al. Serum Uric Acid Level as a Biomarker in Idiopathic and Genetic (p.A53T Alpha-Synuclein Carriers) Parkinson's Disease: Data from the PPMI Study. *Journal of Parkinson's disease* 2020; **10**(2): 481-7.

37. Bougea A, Koros C, Papagiannakis N, et al. Serum Uric Acid in LRRK2 Related Parkinson's Disease: Longitudinal Data from the PPMI Study. *Journal of Parkinson's disease* 2021; **11**(2): 633-40.

38. Koros C, Simitsi AM, Papagiannakis N, et al. Serum uric acid level as a putative biomarker in Parkinson's disease patients carrying GBA1 mutations: 2-Year data from the PPMI study. *Parkinsonism & related disorders* 2021; **84**: 1-4.

39. Seifar F, Dinasarapu AR, Jinnah HA. Uric Acid in Parkinson's Disease: What Is the Connection? *Movement disorders : official journal of the Movement Disorder Society* 2022; **37**(11): 2173-83.

40. Koros C, Simitsi AM, Papagiannakis N, et al. Serum Uric Acid as a Putative Biomarker in Prodromal Parkinson's Disease: Longitudinal Data from the PPMI Study. *Journal of Parkinson's disease* 2023; **13**(5): 811-8.

41. Alrouji M, Al-Kuraishy HM, Al-Mahammadawy AAA, Al-Gareeb AI, Saad HM, Batiha GE. The potential role of cholesterol in Parkinson's disease neuropathology: perpetrator or victim. *Neurological sciences : official journal of the Italian Neurological Society and of the Italian Society of Clinical Neurophysiology* 2023; **44**(11): 3781-94.

42. Wang K, Luo Z, Li C, et al. Blood Cholesterol Decreases as Parkinson's Disease Develops and Progresses. *Journal of Parkinson's disease* 2021; **11**(3): 1177-86.

43. Pingale TD, Gupta GL. Novel therapeutic approaches for Parkinson's disease by targeting brain cholesterol homeostasis. *The Journal of pharmacy and pharmacology* 2021; **73**(7): 862-73.

44. Garcia-Sanz P, J MFGA, Moratalla R. The Role of Cholesterol in alpha-Synuclein and Lewy Body Pathology in GBA1 Parkinson's Disease. *Movement disorders : official journal of the Movement Disorder Society* 2021; **36**(5): 1070-85.

45. Jin U, Park SJ, Park SM. Cholesterol Metabolism in the Brain and Its Association with Parkinson's Disease. *Experimental neurobiology* 2019; **28**(5): 554-67.

46. Park JH, Lee CW, Nam MJ, et al. Association of High-Density Lipoprotein Cholesterol Variability and the Risk of Developing Parkinson Disease. *Neurology* 2021; **96**(10): e1391-e401.

47. Staszewski J, Piusinska-Macoch R, Brodacki B, Skrobowska E, Stepień A. Association between hemostatic markers, serum lipid fractions and progression of cerebral small vessel disease: A 2-year follow-up study.

*Neurologia i neurochirurgia polska* 2018; **52**(1): 54-63.

48. Hottman DA, Chernick D, Cheng S, Wang Z, Li L. HDL and cognition in neurodegenerative disorders. *Neurobiology of disease* 2014; **72 Pt A**: 22-36.

49. Wei Q, Wang H, Tian Y, Xu F, Chen X, Wang K. Reduced serum levels of triglyceride, very low density lipoprotein cholesterol and apolipoprotein B in Parkinson's disease patients. *PLoS one* 2013; **8**(9): e75743.

50. Foltynie T, Athauda D. Diabetes, BMI, and Parkinson's. *Movement disorders : official journal of the Movement Disorder Society* 2020; **35**(2): 201-3.

51. Huang W, Xu Y, Zhang Y, et al. Metabolomics-driven identification of adenosine deaminase as therapeutic target in a mouse model of Parkinson's disease. *Journal of neurochemistry* 2019; **150**(3): 282-95.

52. Ivanova EA, Zolotov NN, Kapitsa IG, Pozdnev VF, Valdman EA, Voronina TA. [Effect of afobazole and levodopa on the activity of proline-specific proteinases and adenosine deaminase in blood serum and brain structures of rats with experimental Parkinson's syndrome induced by systemic administration of rotenone]. *Biomeditsinskaiia khimiia* 2017; **63**(6): 565-9.

53. Chiba S, Matsumoto H, Saitoh M, Kasahara M, Matsuya M, Kashiwagi M. A correlation study between serum adenosine deaminase activities and peripheral lymphocyte subsets in Parkinson's disease. *Journal of the neurological sciences* 1995; **132**(2): 170-3.

54. Chiba S, Kashiwagi M, Kobayashi N, Saito M, Matsumoto H. [Serum adenosine deaminase and its isozyme activities in patients with Parkinson's disease]. *Rinsho shinkeigaku = Clinical neurology* 1993; **33**(1): 86-8.

55. Jimenez-Jimenez FJ, Molina JA, Fernandez-Calle P, et al. Serum levels of vitamin A in Parkinson's disease. *Journal of the neurological sciences* 1992; **111**(1): 73-6.

56. Chowdhury CS, Wareham E, Xu J, et al. Rap1b-loss increases neutrophil lactate dehydrogenase activity to enhance neutrophil migration and acute inflammation in vivo. *Frontiers in immunology* 2022; **13**: 1061544.

57. Wu XB, Hou SL, Liu H. Systemic immune inflammation index, ratio of lymphocytes to monocytes, lactate dehydrogenase and prognosis of diffuse large B-cell lymphoma patients. *World journal of clinical cases* 2021; **9**(32): 9825-34.

58. Miyoshi N, Tanigawa T, Nishioka S, et al. Association of salivary lactate dehydrogenase level with systemic inflammation in a Japanese population. *Journal of periodontal research* 2018; **53**(4): 487-94.

59. Yoshizaki S, Tamaru T, Hara M, et al. Microglial inflammation after chronic spinal cord injury is enhanced by reactive astrocytes via the fibronectin/beta1 integrin pathway. *Journal of neuroinflammation* 2021; **18**(1): 12.

60. Lemanska-Perek A, Adamik B. Fibronectin and its soluble EDA-FN isoform as biomarkers for inflammation and sepsis. *Advances in clinical and experimental medicine : official organ Wroclaw Medical University* 2019; **28**(11): 1561-7.

61. Dhanesha N, Chorawala MR, Jain M, et al. Fn-EDA (Fibronectin Containing Extra Domain A) in the Plasma, but Not Endothelial Cells, Exacerbates Stroke Outcome by Promoting Thrombo-Inflammation. *Stroke* 2019; **50**(5): 1201-9.

62. Dhanesha N, Ahmad A, Prakash P, Doddapattar P, Lentz SR, Chauhan AK. Genetic Ablation of Extra Domain A of Fibronectin in Hypercholesterolemic Mice Improves Stroke Outcome by Reducing Thrombo-Inflammation.

*Circulation* 2015; **132**(23): 2237-47.

63. Khan MM, Gandhi C, Chauhan N, et al. Alternatively-spliced extra domain A of fibronectin promotes acute inflammation and brain injury after cerebral ischemia in mice. *Stroke* 2012; **43**(5): 1376-82.
64. Brenmoehl J, Falk W, Goke M, Scholmerich J, Rogler G. Inflammation modulates fibronectin isoform expression in colonic lamina propria fibroblasts (CLPF). *International journal of colorectal disease* 2008; **23**(10): 947-55.
65. Goos M, Lange P, Hanisch UK, et al. Fibronectin is elevated in the cerebrospinal fluid of patients suffering from bacterial meningitis and enhances inflammation caused by bacterial products in primary mouse microglial cell cultures. *Journal of neurochemistry* 2007; **102**(6): 2049-60.
66. Bouvenot G, Bartolin C, Barriol A, Echahanian M, Arnaud C. [Plasma fibronectin and proteins in biological inflammation. Study of statistic relations]. *Revue du rhumatisme et des maladies osteo-articulaires* 1988; **55**(1): 75-6.
67. Stecher VJ, Kaplan JE, Connolly K, Mielens Z, Saelens JK. Fibronectin in acute and chronic inflammation. *Arthritis and rheumatism* 1986; **29**(3): 394-9.
68. Scott DL, Robinson MW, Yoshino S. Fibronectin in chronic inflammation: studies using the rat air pouch model of chronic allergic inflammation. *British journal of experimental pathology* 1985; **66**(5): 519-26.
69. Torbitz VD, Bochi GV, de Carvalho JA, de Almeida Vaucher R, da Silva JE, Moresco RN. In vitro oxidation of fibrinogen promotes functional alterations and formation of advanced oxidation protein products, an inflammation mediator. *Inflammation* 2015; **38**(3): 1201-6.
70. Wong KT, Grove JS, Grandinetti A, et al. Association of fibrinogen with Parkinson disease in elderly Japanese-American men: a prospective study. *Neuroepidemiology* 2010; **34**(1): 50-4.
71. Xu Q, Lai Q, Wang J, et al. Association between plasminogen activator inhibitor-1 gene polymorphisms and susceptibility to Parkinson's disease in Chinese patients. *Acta neurologica Belgica* 2022; **122**(6): 1557-66.
72. Reuland CJ, Church FC. Synergy between plasminogen activator inhibitor-1, alpha-synuclein, and neuroinflammation in Parkinson's disease. *Medical hypotheses* 2020; **138**: 109602.
73. Pan H, Zhao Y, Zhai Z, et al. Role of plasminogen activator inhibitor-1 in the diagnosis and prognosis of patients with Parkinson's disease. *Experimental and therapeutic medicine* 2018; **15**(6): 5517-22.



**Supplementary table 2.** The selection and definition of 6 milestones.

| Milestones             | Definition                                                                                                                                                                                                                                                                                                                                                                                                                                                                                                                                 | Reference                                                                                                                                                              |
|------------------------|--------------------------------------------------------------------------------------------------------------------------------------------------------------------------------------------------------------------------------------------------------------------------------------------------------------------------------------------------------------------------------------------------------------------------------------------------------------------------------------------------------------------------------------------|------------------------------------------------------------------------------------------------------------------------------------------------------------------------|
| Frequent Falling*      | A notation in the clinical record, or a reporting from caregiver, that multiple falls due to their Parkinson's disease, were occurring. Isolated falls were ignored, even if fractures had resulted.                                                                                                                                                                                                                                                                                                                                       | Hely, M. A, et al. <i>Mov Disord</i> , 2005, 20(2), 190-9 <sup>3</sup> .<br>Peter A. Kempster. <i>Brain</i> , 2010: 133; 1755–1762 <sup>2</sup> .                      |
| Wheelchair dependence  | After an optimal drug treatment, persistent losing a walking ability without wheelchair or walker                                                                                                                                                                                                                                                                                                                                                                                                                                          | De Pablo-Fernandez, E, et al. <i>JAMA Neurol</i> , 2019, 76(4): 470-479 <sup>4</sup>                                                                                   |
| Residential care       | Long-term admission to a residential high-level care facility;<br>Or highly dependent of nursing staff at home.                                                                                                                                                                                                                                                                                                                                                                                                                            | Peter A. Kempster, et al. <i>Brain</i> , 2010: 133; 1755–1762 <sup>2</sup> .<br>De Pablo-Fernandez, E, et al. <i>JAMA Neurol</i> , 2019, 76(4): 470-479 <sup>4</sup> . |
| Dementia               | A neuropsychological diagnosis of dementia was made on the basis of impairment in memory and at least two other areas of cognitive functioning;<br>If no neuropsychological assessment was made, a diagnosis of dementia was based on a Clinical Dementia Rating $\geq 1$ with supporting evidence from carers of gradual cognitive decline sufficient to impair daily function;<br>If reports from caregivers, diagnosis of dementia was made on the basis of cognitive impairments severe enough to significantly affect tasks of daily. | Hely, Mariese A, et al. <i>Mov Disord</i> . 2008, 30; 23(6): 837-44. <sup>5</sup><br>De Pablo-Fernandez, E. <i>JAMA Neurol</i> , 2019, 76(4): 470-479 <sup>4</sup> .   |
| Severe hallucinations* | Reporting of persistent formed visual hallucinations; hallucination related to infection, dehydration and antiparkinsonian agents were excluded.                                                                                                                                                                                                                                                                                                                                                                                           | Poewe, W. <i>Pract</i> , et al. <i>Neurol</i> , 8(4): 238-41 <sup>6</sup> .<br>Peter A. Kempster, <i>Brain</i> , 2010: 133; 1755–1762 <sup>2</sup> .                   |
| Death                  | Death results from the aggravation of Parkinson's disease or Parkinson's related complications. Death caused by other accidental events were excluded.                                                                                                                                                                                                                                                                                                                                                                                     | De Pablo-Fernandez, E, et al. <i>JAMA Neurol</i> , 2019, 76(4): 470-479 <sup>4</sup> .                                                                                 |

\*The time of onset of each of these was recorded. The first recording of visual hallucinations or falling was taken as the time of onset.

Reference

1. Coelho M, Ferreira JJ. Late-stage Parkinson disease. *Nature reviews Neurology* 2012; 8(8): 435-42.
2. Kempster PA, O'Sullivan SS, Holton JL, Revesz T, Lees AJ. Relationships between age and late progression

- of Parkinson's disease: a clinico-pathological study. *Brain : a journal of neurology* 2010; **133**(Pt 6): 1755-62.
3. Hely MA, Morris JG, Reid WG, Trafficante R. Sydney Multicenter Study of Parkinson's disease: non-L-dopa-responsive problems dominate at 15 years. *Movement disorders : official journal of the Movement Disorder Society* 2005; **20**(2): 190-9.
  4. De Pablo-Fernandez E, Lees AJ, Holton JL, Warner TT. Prognosis and Neuropathologic Correlation of Clinical Subtypes of Parkinson Disease. *JAMA neurology* 2019; **76**(4): 470-9.
  5. Hely MA, Reid WG, Adena MA, Halliday GM, Morris JG. The Sydney multicenter study of Parkinson's disease: the inevitability of dementia at 20 years. *Movement disorders : official journal of the Movement Disorder Society* 2008; **23**(6): 837-44.
  6. Poewe W. When a Parkinson's disease patient starts to hallucinate. *Practical neurology* 2008; **8**(4): 238-41.

**Supplementary table 3.** Survival estimates of subjects by 1-year, 3-year, and 5-year probability generated by nomogram.

Abbreviations: HR, hazard ratio; NA, non available.

| 1- year survival probability | Number of subjects | Median survival (months) | HR (95% CI) | 3- year survival probability | Number of subjects | Median survival (months) | HR (95% CI) | 5-year survival probability | Number of subjects | Median survival (months) | HR (95% CI) |
|------------------------------|--------------------|--------------------------|-------------|------------------------------|--------------------|--------------------------|-------------|-----------------------------|--------------------|--------------------------|-------------|
| ≤0.6                         | 9                  | 9                        | 5-13        | ≤0.1                         | 2                  | 2                        | 2-2         | ≤0.1                        | 11                 | 9                        | 5-13        |
| ≥0.9                         | 72                 | N/A                      | N/A         | ≥0.5                         | 176                | 66                       | 55-77       | ≥0.5                        | 100                | NA                       | NA          |
| 0.6-0.7                      | 12                 | 16                       | 13-19       | 0.1-0.2                      | 4                  | 5.5                      | 1-10        | 0.1-0.2                     | 13                 | 16                       | 10-22       |
| 0.7-0.8                      | 35                 | 41                       | 28-54       | 0.2-0.3                      | 7                  | 22                       | 3-41        | 0.2-0.3                     | 23                 | 64                       | 28-100      |
| 0.8-0.9                      | 90                 | 55                       | 47-63       | 0.3-0.4                      | 10                 | 16                       | 13-19       | 0.3-0.4                     | 35                 | 32                       | 19-45       |
|                              |                    |                          |             | 0.4-0.5                      | 19                 | 64                       | NA          | 0.4-0.5                     | 36                 | 70                       | 36-104      |

**Supplementary Table 4.** Baseline characteristic in HC and PD cohorts.

| Characteristic           | HC<br>(n=218)          | PD<br>(n=218)          | P Value   |
|--------------------------|------------------------|------------------------|-----------|
| Demographic              |                        |                        |           |
| Median age at onset, y   | 61(53-68)              | 63 (54-68)             | 0.162     |
| Sex, No. (%)             |                        |                        |           |
| Male                     | 129 (59.18%)           | 129 (59.18%)           | 1.000     |
| Baseline laboratory test |                        |                        |           |
| Hs-CRP, mg/L             | 0 (0-0.88)             | 0.5 (0-0.82)           | <0.001*** |
| UA, $\mu$ mol/L          | 334.56 (266.75-398.75) | 316.00 (262.75-378.25) | 0.177     |
| Alb, g/L                 | 40.30 (38.20-42.10)    | 39.80 (37.50-42.00)    | 0.387     |
| pFN, mg/L                | 212.50 (190.75-239.00) | 200.12 (182.70-227.0)  | <0.001*** |

Abbreviations: Alb, albumin; Hs-CRP, hypersensitive C-reactive protein; pFN, plasma fibronectin; UA, uric acid.

\*\*\*p<0.001.

**Supplementary table 5.** Multivariate analysis (crude and adjusted) of predictors selected by LASSO regression procedure in the discovery cohort (all).

|                 | Definition              | Univariate Cox regression |           | Multivariate Cox regression |           |
|-----------------|-------------------------|---------------------------|-----------|-----------------------------|-----------|
|                 |                         | Crude HR                  | P Value   | Adjusted HR                 | P Value   |
| First milestone |                         |                           |           |                             |           |
| pFN             | Continuous, mg/L        | 0.981 (0.973-0.989)       | <0.001*** | 0.982 (0.974-0.99)          | <0.001*** |
| Age             | Continuous, years       | 1.023 (1.001-1.045)       | 0.040     | 1.014 (0.993-1.036)         | 0.198     |
| UA              | Continuous, $\mu$ mol/L | 0.997 (0.994-0.999)       | 0.019     | 0.998 (0.995-1)             | 0.096     |
| Alb             | Continuous, g/L         | 0.912 (0.852-0.977)       | 0.009**   | 0.954 (0.889-1.024)         | 0.194     |
| Hs-CRP          | Continuous, mg/L        | 1.037 (1.014-1.060)       | 0.001**   | 1.019 (0.995-1.044)         | 0.115     |
| Fall            |                         |                           |           |                             |           |
| pFN             | Continuous, mg/L        | 0.974 (0.964-0.984)       | <0.001*** | 0.974 (0.964-0.985)         | <0.001*** |
| Age             | Continuous, years       | 1.028 (0.999-1.058)       | 0.057     | 1.024 (0.993-1.055)         | 0.127     |
| UA              | Continuous, $\mu$ mol/L | 0.994 (0.990-0.998)       | 0.002**   | 0.995 (0.991-0.999)         | 0.006     |
| Alb             | Continuous, g/L         | 0.936 (0.856-1.023)       | 0.143     | 0.965 (0.877-1.061)         | 0.459     |
| Hs-CRP          | Continuous, mg/L        | 1.024 (0.979-1.071)       | 0.294     | 1.007 (0.965-1.051)         | 0.758     |
| Wheelchair      |                         |                           |           |                             |           |
| pFN             | Continuous, mg/L        | 0.982 (0.968-0.997)       | 0.019*    | 0.982 (0.966-0.998)         | 0.024*    |
| Age             | Continuous, years       | 1.026 (0.985-1.068)       | 0.224     | 1.024 (0.981-1.068)         | 0.274     |
| UA              | Continuous, $\mu$ mol/L | 0.999 (0.994-1.004)       | 0.686     | 1.000 (0.995-1.005)         | 0.877     |
| Alb             | Continuous, g/L         | 0.986 (0.864-1.127)       | 0.841     | 1.035 (0.905-1.185)         | 0.613     |
| Hs-CRP          | Continuous, mg/L        | 1.050 (0.999-1.104)       | 0.055     | 1.049 (0.997-1.104)         | 0.068     |
| Homecare        |                         |                           |           |                             |           |
| pFN             | Continuous, mg/L        | 0.989 (0.977-1.001)       | 0.061     | 0.989 (0.977-1.002)         | 0.091     |
| Age             | Continuous, years       | 1.021 (0.987-1.056)       | 0.232     | 1.016 (0.982-1.052)         | 0.359     |
| UA              | Continuous, $\mu$ mol/L | 1.000 (0.995-1.004)       | 0.824     | 1.000 (0.996-1.004)         | 0.965     |

|               |                    |                     |       |                     |       |
|---------------|--------------------|---------------------|-------|---------------------|-------|
|               | μmol/L             |                     |       |                     |       |
| Alb           | Continuous, g/L    | 0.954 (0.854-1.065) | 0.401 | 0.987 (0.879-1.108) | 0.824 |
| Hs-CRP        | Continuous, mg/L   | 1.034 (0.993-1.077) | 0.105 | 1.028 (0.986-1.072) | 0.197 |
| Dementia      |                    |                     |       |                     |       |
| pFN           | Continuous, mg/L   | 0.989 (0.975-1.004) | 0.149 | 0.992 (0.976-1.007) | 0.279 |
| Age           | Continuous, years  | 1.034 (0.988-1.082) | 0.238 | 1.028 (0.982-1.077) | 0.238 |
| UA            | Continuous, μmol/L | 0.997 (0.992-1.003) | 0.322 | 0.998 (0.993-1.003) | 0.480 |
| Alb           | Continuous, g/L    | 0.928 (0.812-1.061) | 0.273 | 0.943 (0.816-1.090) | 0.428 |
| Hs-CRP        | Continuous, mg/L   | 0.997 (0.896-1.109) | 0.957 | 0.985 (0.874-1.111) | 0.804 |
| Hallucination |                    |                     |       |                     |       |
| pFN           | Continuous, mg/L   | 0.986 (0.970-1.003) | 0.101 | 0.988 (0.972-1.005) | 0.165 |
| Age           | Continuous, years  | 1.003 (0.955-1.054) | 0.892 | 0.994 (0.946-1.045) | 0.810 |
| UA            | Continuous, μmol/L | 0.995 (0.988-1.002) | 0.160 | 0.996 (0.990-1.003) | 0.281 |
| Alb           | Continuous, g/L    | 0.933 (0.800-1.087) | 0.373 | 0.956 (0.808-1.130) | 0.597 |
| Hs-CRP        | Continuous, mg/L   | 1.011 (0.921-1.111) | 0.814 | 1.003 (0.911-1.104) | 0.953 |
| Death         |                    |                     |       |                     |       |
| pFN           | Continuous, mg/L   | 0.998 (0.970-1.026) | 0.871 | 1.001 (0.969-1.033) | 0.971 |
| Age           | Continuous, years  | 1.024 (0.939-1.117) | 0.588 | 0.967 (0.866-1.081) | 0.559 |
| UA            | Continuous, μmol/L | 0.995 (0.983-1.006) | 0.350 | 1.000 (0.988-1.013) | 0.963 |
| Alb           | Continuous, g/L    | 0.516 (0.352-0.756) | 0.001 | 0.549 (0.339-0.889) | 0.015 |
| Hs-CRP        | Continuous, mg/L   | 1.084 (1.035-1.134) | 0.001 | 1.041 (0.987-1.099) | 0.142 |

Abbreviation: Alb, albumin; HR, hazard ratio; Hs-CRP, hypersensitive C-reactive protein; pFN, plasma fibronectin; UA, uric acid; \*p<0.05; \*\*p<0.01; \*\*\*p<0.001.

**Supplementary table 6.** Baseline Characteristic between high and low pFN in DCE cohort.

| Characteristic   | Validation cohort<br>(n=84) | DCE cohort<br>(n=67) |                    | P Value               |                     |
|------------------|-----------------------------|----------------------|--------------------|-----------------------|---------------------|
|                  |                             | Low pFN<br>(n=33)    | High pFN<br>(n=34) | Validation vs.<br>DCE | Low vs.<br>High pFN |
| Male No. (%)     | 52 (61.90%)                 | 25 (75.76%)          | 18(52.94%)         | 0.866                 | 0.075               |
| Age              | 64 (58.5-69.5)              | 66 (61-71)           | 63 (56.8-68.2)     | 0.875                 | 0.191               |
| Disease duration | 3 (2-6)                     | 3 (1.5-6.5)          | 4 (2-7)            | 0.910                 | 0.404               |

Abbreviation: DCE; pFN, plasma fibronectin; UA, uric acid.

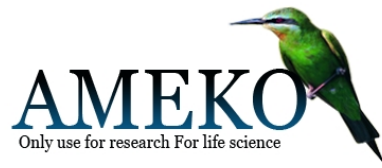

# 人磷酸化 $\alpha$ -突触核蛋白 (p- $\alpha$ -SYN) 酶联免疫

## 检测试剂盒使用说明书

AE90954Hu

使用前仔细阅读本说明书。本酶联免疫试剂盒是基于双抗体夹心技术原理，来检测人磷酸化  $\alpha$ -突触核蛋白 (p- $\alpha$ -SYN)，只能用于研究用途，不得用于医学诊断。

**用 途：**用于人血清、血浆及相关液体样本中磷酸化  $\alpha$ -突触核蛋白 (p- $\alpha$ -SYN) 测定。

### 工作原理

本试剂盒采用的是生物素双抗体夹心酶联免疫吸附法 (ELISA) 测定样品中人磷酸化  $\alpha$ -突触核蛋白 (p- $\alpha$ -SYN) 水平。向预先包被了人磷酸化  $\alpha$ -突触核蛋白 (p- $\alpha$ -SYN) 单克隆抗体的酶标孔中加入人磷酸化  $\alpha$ -突触核蛋白 (p- $\alpha$ -SYN)，温育；温育后，加入生物素标记的抗 p- $\alpha$ -SYN 抗体。再与链霉亲和素-HRP 结合，形成免疫复合物，再经过温育和洗涤，去除未结合的酶，然后加入底物 A、B，产生蓝色，并在酸的作用下转化成最终的黄色。颜色的深浅与样品中人磷酸化  $\alpha$ -突触核蛋白 (p- $\alpha$ -SYN) 的浓度呈正相关。

### 试剂盒组成

| 试剂盒组成                       | 48 孔配置          | 96 孔配置          | 保存      |
|-----------------------------|-----------------|-----------------|---------|
| 说明书                         | 1 份             | 1 份             |         |
| 封板膜                         | 2 片 (48)        | 2 片 (96)        |         |
| 密封袋                         | 1 个             | 1 个             |         |
| 酶标包被板                       | 1×48            | 1×96            | 2-8℃ 保存 |
| 标准品 120ng/L                 | 0.5ml×1 瓶       | 0.5ml×1 瓶       | 2-8℃ 保存 |
| 标准品稀释液                      | 3ml×1 瓶         | 6ml×1 瓶         | 2-8℃ 保存 |
| 链霉亲和素-HRP                   | 3 ml×1 瓶        | 6 ml×1 瓶        | 2-8℃ 保存 |
| 生物素标记的抗 p- $\alpha$ -SYN 抗体 | 0.5ml×1 瓶       | 1 ml×1 瓶        | 2-8℃ 保存 |
| 显色剂 A 液                     | 3 ml×1 瓶        | 6 ml×1 瓶        | 2-8℃ 保存 |
| 显色剂 B 液                     | 3 ml×1 瓶        | 6 ml×1 瓶        | 2-8℃ 保存 |
| 终止液                         | 3ml×1 瓶         | 6ml×1 瓶         | 2-8℃ 保存 |
| 浓缩洗涤液                       | (20ml×20 倍)×1 瓶 | (20ml×30 倍)×1 瓶 | 2-8℃ 保存 |

## 需要而未提供的试剂和器材

1. 37℃恒温箱。
2. 标准规格酶标仪。
3. 精密移液器及一次性吸头
4. 蒸馏水，
5. 一次性试管
6. 吸水纸

## 注意事项

1. 从 2-8℃取出的试剂盒，在开启试剂盒之前要室温平衡至少 30 分钟。酶标包被板开封后如未用完，板条应装入密封袋中保存。
2. 各步加样均应使用加样器，并经常校对其准确性，以避免试验误差
3. 严格按照说明书的操作进行，试验结果判定必须以酶标仪读数为准。
4. 为避免交叉污染，要避免重复使用手中的吸头和封板膜。
5. 不用的其它试剂应包装好或盖好。不同批号的试剂不要混用。保质前使用。
6. 底物 B 对光敏感，避免长时间暴露于光下。

## 洗板方法

手工洗板方法：甩掉酶标板内的液体；在实验台上铺垫几层吸水纸，酶标板朝下用力拍几次；将稀释后的洗涤液至少 0.35ml 注入孔内，浸泡 1-2 分钟。根据需要，重复此过程数次。

自动洗板：如果有自动洗板机，应在熟练使用后再用到正式实验过程中

## 标本要求



1. 不能检测含 NaN<sub>3</sub> 的样品，因 NaN<sub>3</sub> 抑制辣根过氧化物酶的（HRP）活性。
2. 标本采集后尽早进行提取，提取按相关文献进行，提取后应尽快进行实验。若不能马上进行试验，可将标本放于-20℃保存，但应避免反复冻融。

### 操作程序

1. 标准品的稀释：（本试剂盒提供原倍标准品一支，用户可按照下列图表在小试管中进行稀释。）

|          |        |                                 |
|----------|--------|---------------------------------|
| 60ng/L   | 5 号标准品 | 120 μl 的原倍标准品加入 120 μl 标准品稀释液   |
| 30ng/L   | 4 号标准品 | 120 μl 的 5 号标准品加入 120 μl 标准品稀释液 |
| 15ng/L   | 3 号标准品 | 120 μl 的 4 号标准品加入 120 μl 标准品稀释液 |
| 7.5ng/L  | 2 号标准品 | 120 μl 的 3 号标准品加入 120 μl 标准品稀释液 |
| 3.75ng/L | 1 号标准品 | 120 μl 的 2 号标准品加入 120 μl 标准品稀释液 |

2. 根据待测样品数量加上标准品的数量决定所需的板条数。每个标准品和空白孔建议做复孔。每个样品根据自己的数量来定，能使用复孔的尽量做复孔。
3. 加样：1) 空白孔，空白对照孔不加样品，生物素标记的抗 p-α-SYN 抗体，链霉亲和素-HRP，只加显色剂 A&B 和终止液，其余各步操作相同；2) 标准品孔：加入标准品 50ul，链霉亲和素-HRP50ul (标准品中已事先整合好生物素抗体，故不加)；3) 代测样品孔：加入样本 40ul，然后各加入抗 p-α-SYN 抗体 10ul、链霉亲和素-HRP50ul，盖上封板膜，轻轻震荡混匀，37℃温育 60 分钟。
4. 配液：将 30 倍浓缩洗涤液用蒸馏水 30 倍稀释后备用。
5. 洗涤：小心揭掉封板膜，弃去液体，甩干，每孔加满洗涤液，静置 30 秒后弃去，如此重复 5 次，拍干。
6. 显色：每孔先加入显色剂 A50ul，再加入显色剂 B50 μl，轻轻震荡混匀，37℃避光显色 15 分钟。
7. 终止：每孔加终止液 50 μl，终止反应（此时蓝色立转黄色）。
8. 测定：以空白孔调零，450nm 波长依序测量各孔的吸光度（OD 值）。测定应在加终止液后 10 分钟以内进行。
9. 根据标准品的浓度及对应的 OD 值计算出标准曲线的直线回归方程，再根据

样品的 OD 值在回归方程上计算出对应的样品浓度。也可以使用各种应用软件来计算。

**操作程序总结:**

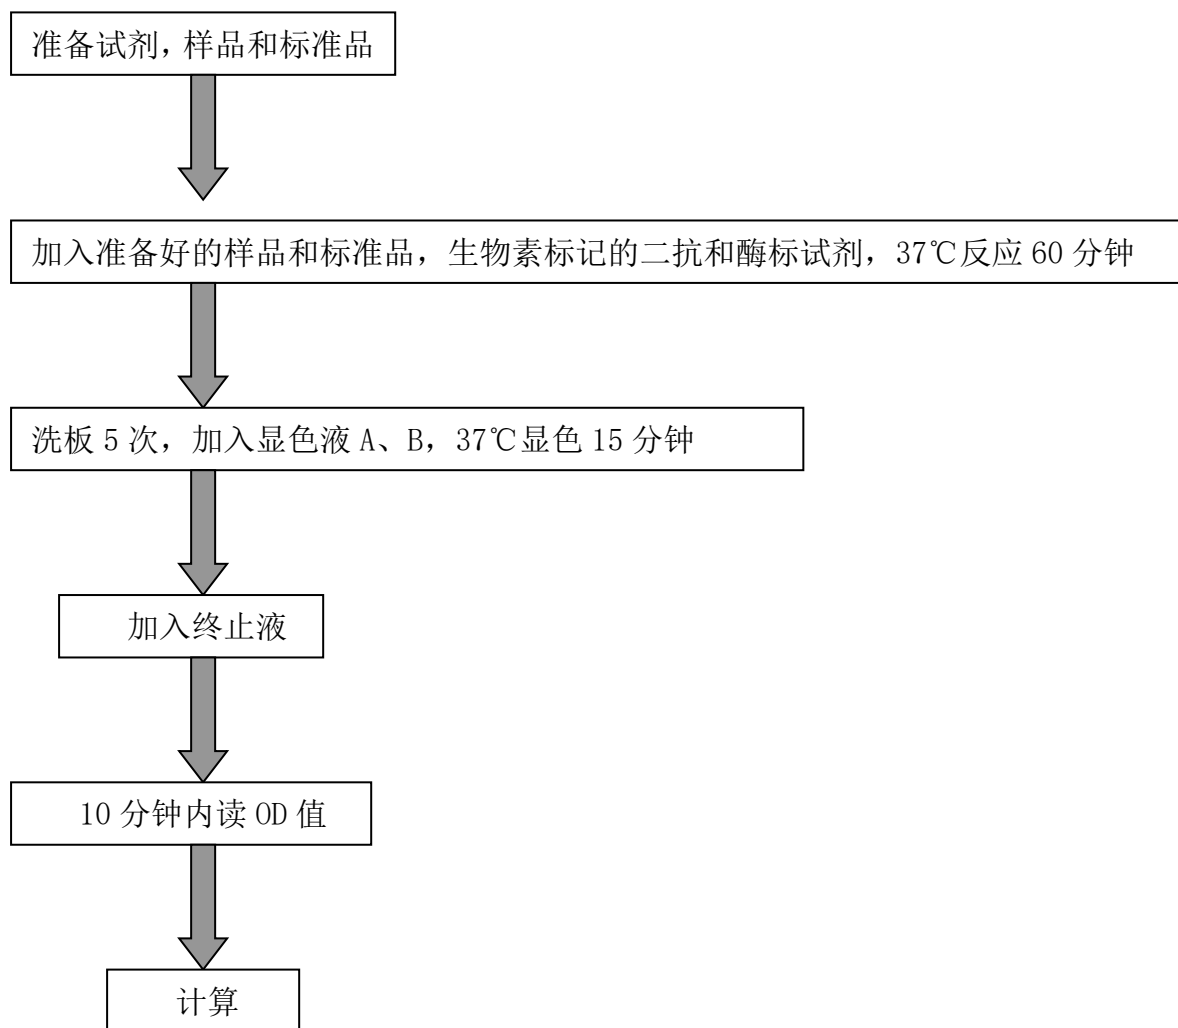

**试剂盒性能:**

1. 样品线性回归与预期浓度相关系数 R 值为 0.92 以上。
2. 批内与批间应分别小于 9%和 15%

**检测范围:**

检测范围: 1.5ng/L -60ng/L

**保存条件及有效期:**

保存: 2-8°C。

有效期: 6 个月(2-8°C)。

# Human p- $\alpha$ -SYN ELISA Kit

## Instruction

This kit is only for scientific research, and shall not be used as a clinical diagnosis of use.

### Purpose

This kit allows for the determination of p- $\alpha$ -SYN concentrations in Human serum, cell culture supernatant, and other biological fluids.

### Principle

The kit assay Human p- $\alpha$ -SYN level in the sample, add Human p- $\alpha$ -SYN antibody to microtiter plate wells, after Incubating, add Biotinylated anti-p- $\alpha$ -SYN antibody, then Combined Streptavidin-HRP, become complex, after Incubating and washing Completely, Add TMB substrate solution, TMB substrate becomes blue color, reaction is terminated by the addition of a sulphuric acid solution and the color change is measured spectrophotometrically at a wavelength of 450 nm. The concentration of p- $\alpha$ -SYN in the samples is then determined by comparing the O.D. of the samples to the standard curve.

### Materials provided with the kit

| Materials provided with the kit | 48determinations | 96 determinations | Storage |
|---------------------------------|------------------|-------------------|---------|
| User manual                     | 1                | 1                 |         |
| Closure plate membrane          | 2                | 2                 |         |
| Sealed bags                     | 1                | 1                 |         |
| Microelisa stripplate           | 1                | 1                 | 2-8°C   |
| Standard: 120ng/L               | 0.5ml×1 bottle   | 0.5ml×1 bottle    | 2-8°C   |
| Standard diluent                | 3ml×1 bottle     | 6ml×1 bottle      | 2-8°C   |
| Streptavidin-HRP                | 3ml×1 bottle     | 6ml×1 bottle      | 2-8°C   |
| Biotinylated anti -p- $\alpha$  | 0.5ml×1 bottle   | 1ml×1 bottle      | 2-8°C   |

|                      |                            |                            |      |
|----------------------|----------------------------|----------------------------|------|
| -SYN -antibody       |                            |                            |      |
| Chromogen Solution A | 3ml×1 bottle               | 6ml×1 bottle               | 2-8℃ |
| Chromogen Solution B | 3ml×1 bottle               | 6ml×1 bottle               | 2-8℃ |
| Stop Solution        | 3ml×1 bottle               | 6ml×1 bottle               | 2-8℃ |
| wash solution        | (20ml×20 fold)<br>×1bottle | (20ml×30 fold)<br>×1bottle | 2-8℃ |

### Materials required but not supplied

1. 37 °C incubator
2. Standard microplate reader(450nm)
3. Precision pipettes and Disposable pipette tips.
4. deionized water.
5. Disposable Test tube
- 6 Absorbent paper

### Important notes

1. The kit takes out from the refrigeration environment should be balanced 15-30 minutes in the room temperature, ELISA plates coated if has not use up after opened, the plate should be stored in Sealed bag.
2. add Sample with sampler Each step, And proofread its accuracy frequently, avoids the experimental error.
3. Please according to use instruction strictly, The test result determination must take the microtiter plate reader as a standard.
4. Use new disposal plastic pipette tips and Closure plate membrane for each standard, in order to avoid cross contamination.
5. Do not mix reagents with those from other lots.
6. The substrate evade the light preservation.

### Specimen requirements

1. extract as soon as possible after Specimen collection,and according to the relevant literature, and should be experiment as soon as possible after the extraction. If it can't, specimen can be kept in -20 °C to preserve, Avoid repeated freeze-thaw cycles.

2. Can't detect the sample which contain NaN<sub>3</sub>, because NaN<sub>3</sub> inhibits HRP active.

### Assay procedure

1. Dilute and add sample: Dilute Original density Standard as follow table:

|          |            |                                                        |
|----------|------------|--------------------------------------------------------|
| 60ng/L   | 5 Standard | 120μl Original density Standard+120μl Standard diluent |
| 30ng/L   | 4 Standard | 120μl 5 Standard+120μl Standard diluent                |
| 15ng/L   | 3 Standard | 120μl 4 Standard+120μl Standard diluent                |
| 7.5ng/L  | 2 Standard | 120μl 3 Standard +120μl Standard diluent               |
| 3.75ng/L | 1 Standard | 120μl 2 Standard +120μl Standard diluent               |

2. according testing Sample numbers to define how many wells need, Standard and blank suggested Do holes.

3.add sample: 1) blank wells: (blank comparison wells don't add sample , Biotinylated anti -p- α -SYN -antibody and Streptavidin-HRP ,other each step operation is same); 2) Standard wells: add Standard 50μl and Streptavidin-HRP 50μl; 3) testing Sample wells: add sample 40μl,then add anti -p- α -SYN -antibody 10μl , Streptavidin-HRP 50μl. closing plate with Closure plate membrane ,incubate for 60 min at 37°C.

4.Configurate liquid: 30-fold(or 20-fold) wash solution diluted 30-fold (or 20-fold) with distilled water and reserve.

5.washing : Uncover Closure plate membrane, discard Liquid, dry by swing, add washing buffer to every well, still for 30s then drain, repeat 5 times, dry by pat.

6.color : Add Chromogen Solution A 50ul and Chromogen Solution B to each well, evade the light preservation for 15 min at 37°C

7.Stop the reaction : Add Stop Solution50μl to each well, Stop the reaction(the blue color change to yellow color).

8.assay : take blank well as zero , Read absorbance at 450nm after Adding

Stop Solution and within 10min.

9. Calculate of result

**Steps description**

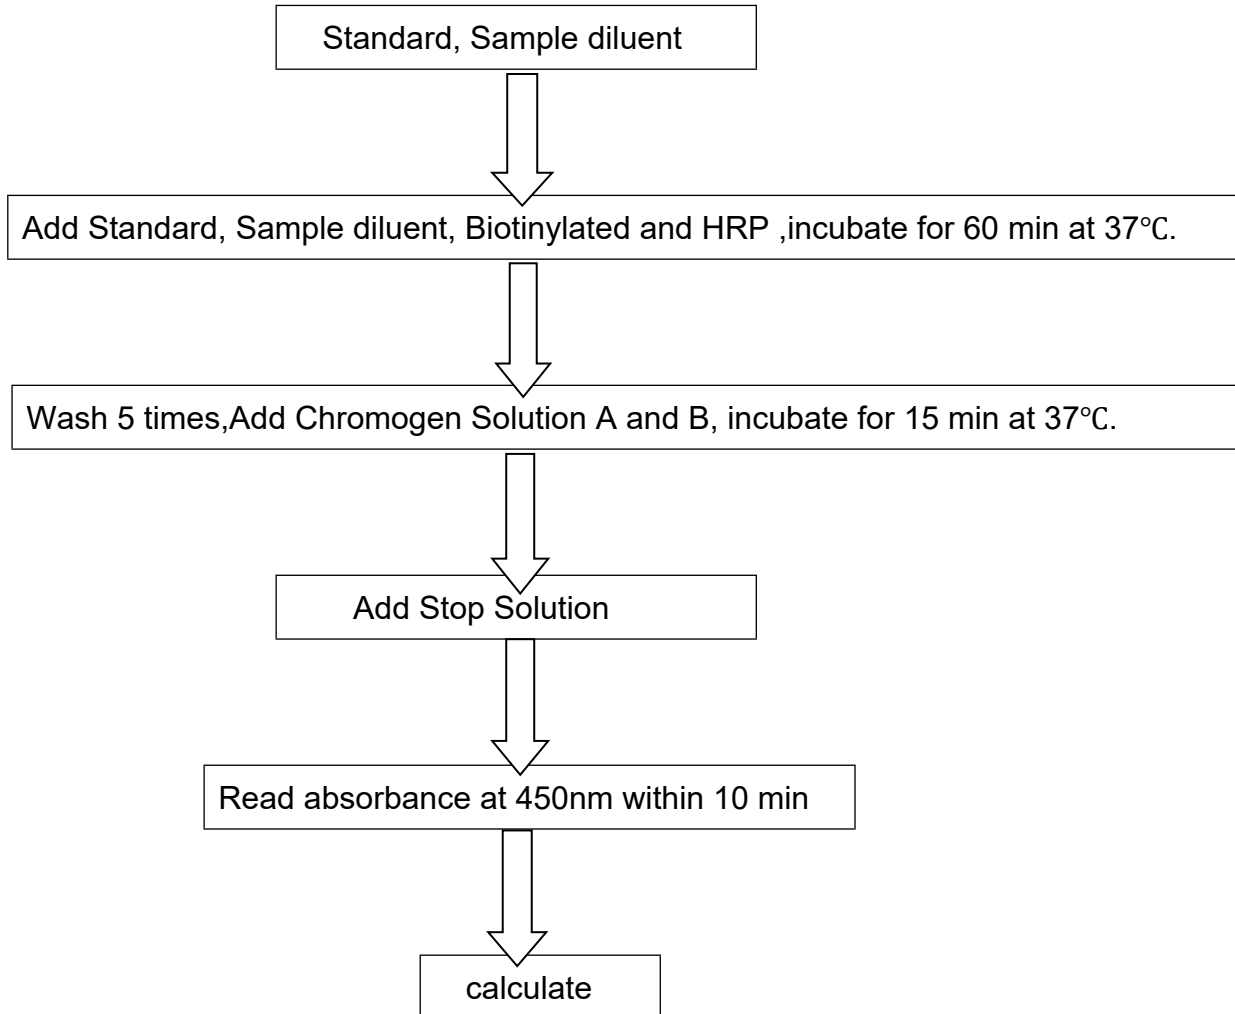

**Assay range**

1.5ng/L -60ng/L

**Storage and validity**

1. Storage : 2-8°C.
2. validity : six months.
